# Supplementary material for: The Staphylococci Phages Family: An Overview
Source: MDPI journal article supplement (doi:10.3390/v4123316), 2012-11-23
Supplement: s1 [file s1]

**Table S1. *S. aureus* phages.**

| (Pro)phage                 | Genome size (pb) | Morphological     |                                 | Cluster (Class) <sup>g</sup> | Genome sequence | Reference |
|----------------------------|------------------|-------------------|---------------------------------|------------------------------|-----------------|-----------|
|                            |                  | sub-family        | genus                           |                              |                 |           |
| <b><i>Siphoviridae</i></b> |                  |                   |                                 |                              |                 |           |
| phi187                     | 39,620           | lambda supergroup | Sfi11-like <sup>a</sup>         | 1(II)                        | yes             | [1]       |
| phi69                      | 42,732           | lambda supergroup | Sfi11-like <sup>a</sup>         | 1(II)                        | yes             | [1]       |
| phi53                      | 43,883           | lambda supergroup | Sfi11-like <sup>a</sup>         | 1(II)                        | yes             | [1]       |
| phi85                      | 44,238           | lambda supergroup | Sfi11-like <sup>a</sup>         | 1(II)                        | yes             | [1]       |
| phi2638A                   | 41,318           | lambda supergroup | Sfi21-like <sup>a</sup>         | 6(II)                        | yes             | [1]       |
| phi77                      | 41,708           | lambda supergroup | Sfi21-like <sup>a</sup>         | 6(II)                        | yes             | [1]       |
| phi42e                     | 45,861           | lambda supergroup | Sfi21-like <sup>a</sup>         | 4(II)                        | yes             | [1]       |
| phi3A                      | 43,095           | lambda supergroup | Sfi21-like <sup>a</sup>         | 4(II)                        | yes             | [1]       |
| phi47                      | 44,777           | lambda supergroup | Sfi21-like <sup>a</sup>         | 4(II)                        | yes             | [1]       |
| phi37                      | 43,681           | lambda supergroup | Sfi11-like <sup>a</sup>         | 3(II)                        | yes             | [1]       |
| phiEW                      | 45,286           | lambda supergroup | Sfi11-like <sup>a</sup>         | 3(II)                        | yes             | [1]       |
| phi96                      | 43,576           | lambda supergroup | Sfi11-like <sup>a</sup>         | 2(II)                        | yes             | [1]       |
| phiROSA                    | 43,155           | lambda supergroup | Sfi11-like <sup>a</sup>         | 2(II)                        | yes             | [1]       |
| phi71                      | 43,114           | lambda supergroup | Sfi11-like <sup>a</sup>         | 2(II)                        | yes             | [1]       |
| phi55                      | 41,902           | lambda supergroup | Sfi11-like <sup>a</sup>         | 2(II)                        | yes             | [1]       |
| phi29                      | 42,802           | lambda supergroup | Sfi11-like <sup>a</sup>         | 2(II)                        | yes             | [1]       |
| phi52A                     | 41,690           | lambda supergroup | Sfi11-like <sup>a</sup>         | 2(II)                        | yes             | [1]       |
| phi88                      | 43,231           | lambda supergroup | Sfi11-like <sup>a</sup>         | 2(II)                        | yes             | [1]       |
| phiX2                      | 43,440           | lambda supergroup | Sfi11-like <sup>a</sup>         | 2(II)                        | yes             | [1]       |
| phi92                      | 42,431           | lambda supergroup | Sfi11-like <sup>a</sup>         | 2(II)                        | yes             | [1]       |
| phiPVL                     | 41,401           | lambda supergroup | Sfi21-like (gr1) <sup>b,c</sup> | 5(II)                        | yes             | [2, 3]    |
| phiSLT                     | 42,942           | lambda supergroup | Sfi21-like (gr2) <sup>b,c</sup> | 4(II)                        | yes             | [3, 4]    |
| phiPV83-pro                | 45,636           | lambda supergroup | Sfi21-like (gr1) <sup>b,c</sup> | 5(II)                        | yes             | [3, 5]    |
| phi108-PVL                 | 44,107           | lambda supergroup | Sfi21-like (gr1) <sup>b,c</sup> | 5(II)                        | yes             | [3, 6]    |
| phiSa2mw                   | 45,924           | lambda supergroup | Sfi21-like (gr2) <sup>b,c</sup> | ND                           | yes             | [6, 7]    |
| phiSa2958                  | 46,046           | lambda supergroup | Sfi21-like (gr2) <sup>b,c</sup> | 4(II)                        | yes             | [3, 8]    |
| phiSa2usa                  | 43,062           | lambda supergroup | Sfi21-like (gr2) <sup>b,c</sup> | ND                           | yes             | [3, 9]    |
| phi7247PVL                 | 42,142           | lambda supergroup | Sfi21-like (gr3) <sup>b,c</sup> | ND                           | yes             | [3]       |
| phi5967PVL                 | 42,142           | lambda supergroup | Sfi21-like (gr3) <sup>b,c</sup> | ND                           | yes             | [3]       |
| phiETA                     | 43,081           | lambda supergroup | Sfi11-like <sup>b</sup>         | 2(II)                        | yes             | [10]      |
| phiN315                    | 44,257           | lambda supergroup | Sfi21-like (gr3) <sup>b,c</sup> | 6(II)                        | yes             | [11, 12]  |

|                           |         |                    |                                 |        |                               |          |
|---------------------------|---------|--------------------|---------------------------------|--------|-------------------------------|----------|
| phiMu50A                  | 43,053  | lambda supergroup  | Sfi21-like (gr3) <sup>b,c</sup> | ND     | yes                           | [11, 12] |
| phiMu50B                  | 44,391  | lambda supergroup  | Sfi11-like <sup>b</sup>         | ND     | yes                           | [11, 12] |
| phiSa3mw                  | ND      | lambda supergroup  | Sfi21-like (gr1) <sup>b,c</sup> | ND     | yes (MW2 strain genome)       | [7, 12]  |
| phiSa3ms                  | 42,612  | lambda supergroup  | Sfi21-like <sup>d</sup>         | ND     | yes                           | [13]     |
| phiSa3                    | ND      | lambda supergroup  | Sfi21-like <sup>a</sup>         | ND     | yes (NCTC832 5 strain genome) | [14, 15] |
| phi11                     | 43,658  | lambda supergroup  | Sfi11-like <sup>e</sup>         | 1(II)  | yes                           | [16]     |
| phi12                     | 44,970  | lambda supergroup  | Sfi11-like <sup>e</sup>         | 4(II)  | yes                           | [16]     |
| phi13                     | 42,774  | lambda supergroup  | Sfi21-like <sup>e</sup>         | 5(II)  | yes                           | [16]     |
| L54a <sup>f</sup>         | ND      | ND                 | ND                              | ND     | No                            | [17]     |
| phiNM1                    | 43,128  | lambda supergroup  | ND                              | 1(II)  | yes                           | [18]     |
| phiNM2                    | 43,145  | lambda supergroup  | ND                              | ND     | yes                           | [18]     |
| phiNM3                    | 44,061  | lambda supergroup  | ND                              | 6(II)  | yes                           | [18]     |
| phiNM4                    | 43,189  | lambda supergroup  | ND                              | 2(II)  | yes                           | [18]     |
| phi80                     | 42,140  | lambda supergroup  | Sfi11-like <sup>b</sup>         | 2(II)  | yes                           | [19]     |
| phi80alpha                | 43,864  | lambda supergroup  | Sfi11-like <sup>b</sup>         | 1(II)  | yes                           | [19]     |
| phiMR11                   | 43,011  | lambda supergroup  | Sfi11-like <sup>a</sup>         | 2(II)  | yes                           | [20]     |
| phiMR25                   | 44,342  | lambda supergroup  | Sfi11-like <sup>a</sup>         | ND     | yes                           | [21]     |
| phiIPLA88                 | 42,526  | lambda supergroup  | Sfi11-like <sup>b</sup>         | 1(II)  | yes                           | [22]     |
| phiIPLA35                 | 45,344  | lambda supergroup  | Sfi21-like <sup>b</sup>         | 4(II)  | yes                           | [22]     |
| TEM126                    | 33,540  | ND                 | Sfi11-like <sup>b</sup>         | ND     | yes                           | [23]     |
| SA11                      | 136,326 | ND                 | ND                              | ND     | yes                           | [24]     |
| <b><i>Podoviridae</i></b> |         |                    |                                 |        |                               |          |
| 66                        | 18,199  | <i>Picovirinae</i> | 44AHJD-like                     | 8(I)   | yes                           | [1]      |
| 44AHJD                    | 16,668  | <i>Picovirinae</i> | 44AHJD-like                     | 8(I)   | yes                           | [1, 25]  |
| P68                       | 18,221  | <i>Picovirinae</i> | 44AHJD-like                     | 8(I)   | yes                           | [1, 25]  |
| SAP2                      | 17,938  | <i>Picovirinae</i> | 44AHJD-like                     | 8(I)   | yes                           | [26]     |
| <b><i>Myoviridae</i></b>  |         |                    |                                 |        |                               |          |
| K                         | 127,395 | Spounaviridae      | Twort-like                      | 7(III) | yes                           | [1, 27]  |
| G1                        | 138,715 | Spounaviridae      | Twort-like                      | 7(III) | yes                           | [1]      |
| Twort                     | 130,706 | Spounaviridae      | Twort-like                      | 7(III) | yes                           | [1]      |
| SAP1                      | ND      | ND                 | ND                              | ND     | No                            | [28]     |
| SAP3                      | ND      | ND                 | ND                              | ND     | No                            | [28]     |
| MSA6                      | 140,194 | Spounaviridae      | Twort-like                      | ND     | yes                           | [29, 30] |
| phi812                    | 146,500 | ND                 | ND                              | ND     | No                            | [31]     |

|                     |         |               |            |        |     |          |
|---------------------|---------|---------------|------------|--------|-----|----------|
| SK311               | 141,100 | ND            | ND         | ND     | No  | [31]     |
| Stau2               | 134,500 | ND            | ND         | ND     | No  | [32]     |
| phiSA012            | ND      | ND            | ND         | ND     | No  | [31]     |
| phiSA039            | ND      | ND            | ND         | ND     | No  | [31]     |
| GH15                | 139,806 | ND            | ND         | ND     | yes | [33]     |
| A5W                 | 137,087 | Spounaviridae | Twort-like | ND     | yes | [30]     |
| Staph1N             | 137,192 | Spounaviridae | Twort-like | ND     | yes | [30]     |
| Fi200W              | 140,079 | Spounaviridae | Twort-like | ND     | yes | [30]     |
| P4W                 | 139,173 | Spounaviridae | Twort-like | ND     | yes | [30]     |
| 676Z                | 140,115 | Spounaviridae | Twort-like | ND     | yes | [30]     |
| A3R                 | 132,712 | Spounaviridae | Twort-like | ND     | yes | [30]     |
| ISP                 | 138,339 | Spounaviridae | Twort-like | ND     | yes | [30, 34] |
| Sb-1                | 127,188 | Spounaviridae | Twort-like | 7(III) | yes | [30, 35] |
| <b>Unclassified</b> |         |               |            |        |     |          |
| PT1028              | 15,603  | ND            | ND         | ND     | yes | [1]      |

Prophages identified by genome strain sequencing and not further characterized are not indicated.

(a) Based on the presence of a putative prohead protease encoded within the DNA packaging and head morphogenesis module, not experimentally tested. Determined in this study

(b) Based on Authors information, experimentally tested or determined on the basis of head genes pattern

(c) Groups 1-3 within Sfi21-like genus determined on the basis of sequences comparison

(d) Determined in this study, based on the presence of a putative prohead protease encoded within the DNA packaging and head morphogenesis module, not experimentally tested. The phiSa3ms phage was indicated as a Sfi11-like *pac*-type phage by the Authors [13]

(e) Experimentally shown as Sfi11-like *pac*-type phage, although a gene encoding a putative prohead protease was annotated, which indicates Sfi21-like *cos*-type phage

(f) The L54a phage is likely a *Siphoviridae* phage since L54a and phi11 were shown to be closely related phages [16]

(g) Following the classification proposed by [40]

ND: not determined; the table is likely not exhaustive.

**Table S2.** *Staphylococci* phages from non-*S. aureus* species

| (Pro)phage        | Genome size (pb) | Morphological |                   |                         | Cluster (Class) <sup>c</sup> | Genome sequence | Host                                   | Ref  |
|-------------------|------------------|---------------|-------------------|-------------------------|------------------------------|-----------------|----------------------------------------|------|
|                   |                  | family        | sub-family        | genus                   |                              |                 |                                        |      |
| CNPH82            | 43,420           | <i>Sipho</i>  | lambda supergroup | Sfi11-like <sup>a</sup> | 3(II)                        | Yes (phage)     | <i>S. epidermidis</i>                  | [36] |
| PH15              | 44,047           | <i>Sipho</i>  | lambda supergroup | Sfi11-like <sup>a</sup> | 3(II)                        | Yes (phage)     | <i>S. epidermidis</i>                  | [36] |
| phi909            | 30,124           | <i>Sipho</i>  | lambda supergroup | Sfi21-like <sup>b</sup> | ND                           | Yes (prophage)  | <i>S. epidermidis</i><br><i>FRI909</i> | [37] |
| vB_SepiS-phiIPLA5 | 43,581           | <i>Sipho</i>  | lambda supergroup | Sfi11-like <sup>a</sup> | ND                           | Yes (phage)     | <i>S. epidermidis</i>                  | [38] |
| vB_SepiS-phiIPLA7 | 42,123           | <i>Sipho</i>  | lambda supergroup | Sfi11-like <sup>a</sup> | ND                           | Yes (phage)     | <i>S. epidermidis</i>                  | [38] |
| phiTM300          | 45,700           | <i>Sipho</i>  | lambda supergroup | Sfi21-like <sup>b</sup> | ND                           | yes (prophage)  | <i>S. carnosus</i><br><i>TM300</i>     | [39] |
| StB12             | 44,714           | <i>Sipho</i>  | lambda supergroup | Sfi11-like <sup>a</sup> | 1(II)                        | yes (phage)     | <i>S. hominis</i>                      | [40] |
| StB27             | 40,071           | <i>Sipho</i>  | lambda supergroup | Sfi11-like <sup>a</sup> | 1(II)                        | yes (phage)     | <i>S. hominis</i>                      | [40] |
| StB20             | 40,917           | <i>Sipho</i>  | lambda supergroup | Sfi21-like <sup>a</sup> | 9(II)                        | yes (phage)     | <i>S. capitis</i>                      | [40] |

Prophages identified by genome strain sequencing and not further characterized are not indicated. (a) Based on Authors information, experimentally tested or determined on the basis of head genes pattern. (b) Determined on the basis of DNA packaging and head morphogenesis gene annotations during this analysis. (c) Following the classification proposed by [40].

*Sipho*: *Siphoviridae*; Ref, reference; ND, not determined.

## References

1. Kwan, T.; Liu, J.; DuBow, M.; Gros, P.; Pelletier, J., The complete genomes and proteomes of 27 *Staphylococcus aureus* bacteriophages. *Proceedings of the National Academy of Sciences of the United States of America* **2005**, 102, (14), 5174-9.

2. Kaneko, J.; Kimura, T.; Narita, S.; Tomita, T.; Kamio, Y., Complete nucleotide sequence and molecular characterization of the temperate staphylococcal bacteriophage phiPVL carrying Panton-Valentine leukocidin genes. *Gene* **1998**, 215, (1), 57-67.
3. Zhang, M.; Ito, T.; Li, S.; Jin, J.; Takeuchi, F.; Lauderdale, T. L.; Higashide, M.; Hiramatsu, K., Identification of the third type of PVL phage in ST59 methicillin-resistant *Staphylococcus aureus* (MRSA) strains. *FEMS microbiology letters* **2011**, 323, (1), 20-8.
4. Narita, S.; Kaneko, J.; Chiba, J.; Piemont, Y.; Jarraud, S.; Etienne, J.; Kamio, Y., Phage conversion of Panton-Valentine leukocidin in *Staphylococcus aureus*: molecular analysis of a PVL-converting phage, phiSLT. *Gene* **2001**, 268, (1-2), 195-206.
5. Zou, D.; Kaneko, J.; Narita, S.; Kamio, Y., Prophage, phiPV83-pro, carrying panton-valentine leukocidin genes, on the *Staphylococcus aureus* P83 chromosome: comparative analysis of the genome structures of phiPV83-pro, phiPVL, phi11, and other phages. *Bioscience, biotechnology, and biochemistry* **2000**, 64, (12), 2631-43.
6. Ma, X. X.; Ito, T.; Chongtrakool, P.; Hiramatsu, K., Predominance of clones carrying Panton-Valentine leukocidin genes among methicillin-resistant *Staphylococcus aureus* strains isolated in Japanese hospitals from 1979 to 1985. *Journal of clinical microbiology* **2006**, 44, (12), 4515-27.
7. Baba, T.; Bae, T.; Schneewind, O.; Takeuchi, F.; Hiramatsu, K., Genome sequence of *Staphylococcus aureus* strain Newman and comparative analysis of staphylococcal genomes: polymorphism and evolution of two major pathogenicity islands. *Journal of bacteriology* **2008**, 190, (1), 300-10.
8. Ma, X. X.; Ito, T.; Kondo, Y.; Cho, M.; Yoshizawa, Y.; Kaneko, J.; Katai, A.; Higashiide, M.; Li, S.; Hiramatsu, K., Two different Panton-Valentine leukocidin phage lineages predominate in Japan. *Journal of clinical microbiology* **2008**, 46, (10), 3246-58.
9. Diep, B. A.; Gill, S. R.; Chang, R. F.; Phan, T. H.; Chen, J. H.; Davidson, M. G.; Lin, F.; Lin, J.; Carleton, H. A.; Mongodin, E. F.; Sensabaugh, G. F.; Perdreau-Remington, F., Complete genome sequence of USA300, an epidemic clone of community-acquired methicillin-resistant *Staphylococcus aureus*. *Lancet* **2006**, 367, (9512), 731-9.
10. Yamaguchi, T.; Hayashi, T.; Takami, H.; Nakasone, K.; Ohnishi, M.; Nakayama, K.; Yamada, S.; Komatsuzawa, H.; Sugai, M., Phage conversion of exfoliative toxin A production in *Staphylococcus aureus*. *Molecular microbiology* **2000**, 38, (4), 694-705.
11. Kuroda, M.; Ohta, T.; Uchiyama, I.; Baba, T.; Yuzawa, H.; Kobayashi, I.; Cui, L.; Oguchi, A.; Aoki, K.; Nagai, Y.; Lian, J.; Ito, T.; Kanamori, M.; Matsumaru, H.; Maruyama, A.; Murakami, H.; Hosoyama, A.; Mizutani-Ui, Y.; Takahashi, N. K.; Sawano, T.; Inoue, R.; Kaito, C.; Sekimizu, K.; Hirakawa, H.; Kuhara, S.; Goto, S.; Yabuzaki, J.; Kanehisa, M.; Yamashita, A.; Oshima, K.; Furuya, K.; Yoshino, C.; Shiba, T.; Hattori, M.; Ogasawara, N.; Hayashi, H.; Hiramatsu, K.; Whole genome

- sequencing of meticillin-resistant *Staphylococcus aureus*. *Lancet* **2001**, 357, (9264), 1225-40.
12. Canchaya, C.; Proux, C.; Fournous, G.; Bruttin, A.; Brussow, H. Prophage Genomics. *Microbiology and Molecular Biology Reviews* **2003**, 67, (2), 238-276.
  13. Sumbly, P.; Waldor, M. K., Transcription of the toxin genes present within the *Staphylococcal* phage phiSa3ms is intimately linked with the phage's life cycle. *Journal of bacteriology* **2003**, 185, (23), 6841-51.
  14. Gillaspay, A. F.; Worrell, V.; Orvis, J.; Roe, B.A.; Dyer, D.W.; Iandolo, J. J. The *Staphylococcus aureus* NCTC8325 Genome. In *Gram positive pathogens*, Fischetti, V., Novick, R., Ferretti, J., Portnoy, D. and Rood, J., Ed. ASM press: 2006.
  15. Feng, Y.; Chen, C. J.; Su, L. H.; Hu, S.; Yu, J.; Chiu, C. H., Evolution and pathogenesis of *Staphylococcus aureus*: lessons learned from genotyping and comparative genomics. *FEMS Microbiol Rev* **2008**, 32, (1), 23-37.
  16. Iandolo, J. J.; Worrell, V.; Groicher, K. H.; Qian, Y.; Tian, R.; Kenton, S.; Dorman, A.; Ji, H.; Lin, S.; Loh, P.; Qi, S.; Zhu, H.; Roe, B. A., Comparative analysis of the genomes of the temperate bacteriophages phi 11, phi 12 and phi 13 of *Staphylococcus aureus* 8325. *Gene* **2002**, 289, (1-2), 109-18.
  17. Lee, C. Y.; Iandolo, J. J., Lysogenic conversion of staphylococcal lipase is caused by insertion of the bacteriophage L54a genome into the lipase structural gene. *Journal of bacteriology* **1986**, 166, (2), 385-91.
  18. Bae, T.; Baba, T.; Hiramatsu, K.; Schneewind, O., Prophages of *Staphylococcus aureus* Newman and their contribution to virulence. *Molecular microbiology* **2006**, 62, (4), 1035-47.
  19. Christie, G. E.; Matthews, A. M.; King, D. G.; Lane, K. D.; Olivarez, N. P.; Tallent, S. M.; Gill, S. R.; Novick, R. P., The complete genomes of *Staphylococcus aureus* bacteriophages 80 and 80alpha--implications for the specificity of SaPI mobilization. *Virology* **2010**, 407, (2), 381-90.
  20. Matsuzaki, S.; Yasuda, M.; Nishikawa, H.; Kuroda, M.; Ujihara, T.; Shuin, T.; Shen, Y.; Jin, Z.; Fujimoto, S.; Nasimuzzaman, M. D.; Wakiguchi, H.; Sugihara, S.; Sugiura, T.; Koda, S.; Muraoka, A.; Imai, S., Experimental protection of mice against lethal *Staphylococcus aureus* infection by novel bacteriophage phi MR11. *The Journal of infectious diseases* **2003**, 187, (4), 613-24.
  21. Hoshiba, H.; Uchiyama, J.; Kato, S.; Ujihara, T.; Muraoka, A.; Daibata, M.; Wakiguchi, H.; Matsuzaki, S., Isolation and characterization of a novel *Staphylococcus aureus* bacteriophage, phiMR25, and its therapeutic potential. *Archives of virology* **2010**, 155, (4), 545-52.
  22. Garcia, P.; Martinez, B.; Obeso, J. M.; Lavigne, R.; Lurz, R.; Rodriguez, A., Functional genomic analysis of two *Staphylococcus aureus* phages isolated from the dairy environment. *Applied and environmental microbiology* **2009**, 75, (24), 7663-73.
  23. Lee, Y. D.; Chang, H. I.; Park, J. H., Genomic sequence of temperate phage TEM126 isolated from wild type *S. aureus*. *Archives of virology* **2011**, 156, (4), 717-20.

24. Kim, M. S.; Myung, H., Complete Genome of Staphylococcus aureus Phage SA11. *Journal of virology* **2012**, 86, (18), 10232.
25. Vybiral, D.; Takac, M.; Loessner, M.; Witte, A.; von Ahsen, U.; Blasi, U., Complete nucleotide sequence and molecular characterization of two lytic Staphylococcus aureus phages: 44AHJD and P68. *FEMS microbiology letters* **2003**, 219, (2), 275-83.
26. Son, J. S.; Lee, S. J.; Jun, S. Y.; Yoon, S. J.; Kang, S. H.; Paik, H. R.; Kang, J. O.; Choi, Y. J., Antibacterial and biofilm removal activity of a podoviridae Staphylococcus aureus bacteriophage SAP-2 and a derived recombinant cell-wall-degrading enzyme. *Applied microbiology and biotechnology* **2010**, 86, (5), 1439-49.
27. O'Flaherty, S.; Coffey, A.; Edwards, R.; Meaney, W.; Fitzgerald, G. F.; Ross, R. P., Genome of Staphylococcal Phage K: a New Lineage of Myoviridae Infecting Gram-Positive Bacteria with a Low G+C Content. *Journal of bacteriology* **2004**, 186, (9), 2862-2871.
28. Son, J. S.; Kim, E. B.; Lee, S. J.; Jun, S. Y.; Yoon, S. J.; Kang, S. H.; Choi, Y. J., Characterization of Staphylococcus aureus derived from bovine mastitis and isolation of two lytic bacteriophages. *The Journal of general and applied microbiology* **2010**, 56, (4), 347-53.
29. Kwiatek, M.; Parasion, S.; Mizak, L.; Gryko, R.; Bartoszcze, M.; Kocik, J., Characterization of a bacteriophage, isolated from a cow with mastitis, that is lytic against Staphylococcus aureus strains. *Archives of virology* **2012**, 157, (2), 225-34.
30. Lobočka, M.; Hejnowicz, M. S.; Dabrowski, K.; Gozdek, A.; Kosakowski, J.; Witkowska, M.; Ulatowska, M. I.; Weber-Dabrowska, B.; Kwiatek, M.; Parasion, S.; Gawor, J.; Kosowska, H.; Glowacka, A., Genomics of staphylococcal Twort-like phages--potential therapeutics of the post-antibiotic era. *Advances in virus research* **2012**, 83, 143-216.
31. Synnott, A. J.; Kuang, Y.; Kurimoto, M.; Yamamichi, K.; Iwano, H.; Tanji, Y., Isolation from sewage influent and characterization of novel Staphylococcus aureus bacteriophages with wide host ranges and potent lytic capabilities. *Applied and environmental microbiology* **2009**, 75, (13), 4483-90.
32. Hsieh, S. E.; Lo, H. H.; Chen, S. T.; Lee, M. C.; Tseng, Y. H., Wide host range and strong lytic activity of Staphylococcus aureus lytic phage Stau2. *Applied and environmental microbiology* **2011**, 77, (3), 756-61.
33. Gu, J.; Liu, X.; Lu, R.; Li, Y.; Song, J.; Lei, L.; Sun, C.; Feng, X.; Du, C.; Yu, H.; Yang, Y.; Han, W., Complete genome sequence of Staphylococcus aureus bacteriophage GH15. *Journal of virology* **2012**, 86, (16), 8914-5.
34. Vandersteegen, K.; Mattheus, W.; Ceysens, P. J.; Bilocq, F.; De Vos, D.; Pirnay, J. P.; Noben, J. P.; Merabishvili, M.; Lipinska, U.; Hermans, K.; Lavigne, R., Microbiological and molecular assessment of bacteriophage ISP for the control of Staphylococcus aureus. *PloS one* **2011**, 6, (9), e24418.
35. Kvachadze, L.; Balarjishvili, N.; Meskhi, T.; Tevdoradze, E.; Skhirtladze, N.; Pataridze, T.; Adamia, R.; Topuria, T.; Kutter, E.; Rohde, C.; Kutateladze, M.,

- Evaluation of lytic activity of staphylococcal bacteriophage Sb-1 against freshly isolated clinical pathogens. *Microbial biotechnology* **2011**, 4, (5), 643-50.
36. Daniel, A.; Bonnen, P. E.; Fischetti, V. A., First complete genome sequence of two Staphylococcus epidermidis bacteriophages. *Journal of bacteriology* **2007**, 189, (5), 2086-100.
  37. Madhusoodanan, J.; Seo, K. S.; Remortel, B.; Park, J. Y.; Hwang, S. Y.; Fox, L. K.; Park, Y. H.; Deobald, C. F.; Wang, D.; Liu, S.; Daugherty, S. C.; Gill, A. L.; Bohach, G. A.; Gill, S. R., An Enterotoxin-Bearing Pathogenicity Island in Staphylococcus epidermidis. *Journal of bacteriology* **2011**, 193, (8), 1854-62.
  38. Gutierrez, D.; Martinez, B.; Rodriguez, A.; Garcia, P., Genomic characterization of two Staphylococcus epidermidis bacteriophages with anti-biofilm potential. *BMC genomics* **2012**, 13, (1), 228.
  39. Rosenstein, R.; Nerz, C.; Biswas, L.; Resch, A.; Raddatz, G.; Schuster, S. C.; Gotz, F., Genome analysis of the meat starter culture bacterium Staphylococcus carnosus TM300. *Applied and environmental microbiology* **2009**, 75, (3), 811-22.
  40. Deghorain, M.; Bobay, L. M.; Smeesters, P. R.; Bousbata, S.; Vermeersch, M.; Perez-Morga, D.; Dreze, P. A.; Rocha, E. P.; Touchon, M.; Van Melderen, L., Characterization of novel phages isolated in coagulase-negative Staphylococci reveals evolutionary relationships with S. aureus phages. *Journal of bacteriology* **2012**, 194, (21), 5829-39.
